# Supplementary material for: Heimite, PbCu2(AsO4)(OH)3 ⋅ 2H2O, a new mineral from the Grosses Chalttal deposit, Switzerland
Source: Copernicus journal article supplement (doi:10.5194/ejm-36-153-2024), 2024-01-30
Supplement: Supplementary file 1 [file ejm-36-153-2024-supplement.zip]

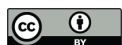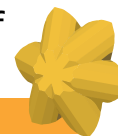

*Supplement of*

**Heimite,  $\text{PbCu}_2(\text{AsO}_4)(\text{OH})_3 \cdot 2\text{H}_2\text{O}$ , a new mineral from the  
Grosses Chaltal deposit, Switzerland**

**Thomas Malcherek et al.**

*Correspondence to:* Thomas Malcherek ([thomas.malcherek@uni-hamburg.de](mailto:thomas.malcherek@uni-hamburg.de))

- [ejm-36-153-2024-supplement-title-page.pdf](#)
- [heimite-cif](#)
  - [checkcif\\_mineral.pdf](#)
  - [mineral.cif](#)

The copyright of individual parts of the supplement might differ from the article licence.
